# Supplementary material for: Active smoking among people with diabetes mellitus or hypertension in Africa: a systematic review and meta-analysis
Source: PubMed Central journal article supplement (PMC6345945; doi:10.1038/s41598-018-37858-z), 2019-01-24

# Active smoking among people with diabetes mellitus or hypertension in Africa: a systematic review and meta-analysis

Jean Jacques Noubiap, Jobert Richie Nansseu, Francky Teddy Endomba, Anderson Ngouo, Jan René Nkeck, Ulrich Flore Nyaga, Arnaud D. Kaze, Jean Joel Bigna

## APPENDIX

---

|                                                                                                                                                                                                |    |
|------------------------------------------------------------------------------------------------------------------------------------------------------------------------------------------------|----|
| Supplementary Table 1 : Characteristics of included studies.....                                                                                                                               | 2  |
| Supplementary Table 2 : Individual characteristics of included studies .....                                                                                                                   | 3  |
| Supplementary Table 3 : Univariate meta-regression analysis for factors associated with the variation of the prevalence of current tobacco smoking in people with hypertension in Africa ..... | 7  |
| Supplementary Table 4: Univariate meta-regression analysis for factors associated with the variation of the prevalence of current tobacco smoking in people with diabetes in Africa.....       | 7  |
|                                                                                                                                                                                                |    |
| Supplementary Figure 1 : Prevalence of active smoking in people with hypertension in Africa according to sex.....                                                                              | 8  |
| Supplementary Figure 2 : Prevalence of active smoking in people with hypertension in Africa according to sub-regions .....                                                                     | 9  |
| Supplementary Figure 3 : Prevalence of active smoking in people with hypertension in Africa according to area .....                                                                            | 10 |
| Supplementary Figure 4 : Prevalence of active smoking in people with hypertension in Africa according to area .....                                                                            | 11 |
| Supplementary Figure 5 : Funnel plot for publication bias in the prevalence of active smoking in people with hypertension in Africa .....                                                      | 12 |
| Supplementary Figure 6 : Prevalence of active smoking in people with diabetes mellitus in Africa according to sex.....                                                                         | 13 |
| Supplementary Figure 7 : Prevalence of active smoking in people with diabetes mellitus in Africa according to sub-regions .....                                                                | 14 |
| Supplementary Figure 8 : Prevalence of active smoking in people with diabetes mellitus in Africa according to area .....                                                                       | 15 |
| Supplementary Figure 9 : Prevalence of active smoking in people with diabetes mellitus in Africa according to setting .....                                                                    | 16 |
| Supplementary Figure 10 : Funnel plot for publication bias in the prevalence of active smoking in people with hypertension in Africa .....                                                     | 17 |

Supplementary Table 1 : *Characteristics of included studies*

| <b>Characteristics</b>           | <b>Hypertension, N = 50</b> | <b>Diabetes, N = 42</b> |
|----------------------------------|-----------------------------|-------------------------|
| Year of publication              | 2000-2017                   | 2002-2017               |
| Period, range                    | 1996-2016 (n = 35)          | 2000-2016 (n = 27)      |
| Mean/median age, range (year)    | 33.0-73.1 (n = 35)          | 33.4-68.0 (n = 35)      |
| % of males                       | 22-100 (n = 47)             | 24-100 (n = 39)         |
| <b>Regions</b>                   |                             |                         |
| - Sub-Saharan Africa             | 46                          | 31                      |
| - Northern Africa                | 4                           | 11                      |
| <b>Sub-regions</b>               |                             |                         |
| - Central Africa                 | 3                           | 4                       |
| - Eastern Africa                 | 16                          | 11                      |
| - Northern Africa                | 4                           | 11                      |
| - Southern Africa                | 7                           | 6                       |
| - Western Africa                 | 18                          | 8                       |
| - Multiregional                  | 2                           | 2                       |
| <b>Number of centres</b>         |                             |                         |
| - Single centre                  | 27                          | 32                      |
| - Multicentre                    | 19                          | 10                      |
| - Unclear                        | 4                           | 0                       |
| <b>Area</b>                      |                             |                         |
| - Urban                          | 18                          | 24                      |
| - Rural                          | 11                          | 3                       |
| - Both                           | 9                           | 3                       |
| - Unclear                        | 12                          | 12                      |
| <b>Setting</b>                   |                             |                         |
| - Population                     | 32                          | 7                       |
| - Hospital                       | 18                          | 35                      |
| <b>Timing of data collection</b> |                             |                         |
| - Prospective                    | 38                          | 30                      |
| - Retrospective                  | 5                           | 9                       |
| - Unclear                        | 7                           | 3                       |
| <b>Sampling</b>                  |                             |                         |
| - Consecutive                    | 20                          | 26                      |
| - Random                         | 19                          | 10                      |
| - Systematic                     | 4                           | 3                       |
| - Stratified consecutive         | 1                           | 0                       |
| - Unclear                        | 1                           | 3                       |

Supplementary Table 2 : Individual characteristics of included studies

| Study              | Country      | Design                          | Number of center | Area         | Setting    | Timing of data collection | Period    | Sampling    | Age, years | Limit age, years | %Male | Disease                | Sample size, Hypertension | Sample size, diabetes mellitus | Risk of bias |
|--------------------|--------------|---------------------------------|------------------|--------------|------------|---------------------------|-----------|-------------|------------|------------------|-------|------------------------|---------------------------|--------------------------------|--------------|
| Abdulsalam, 2014   | Nigeria      | Cross-sectional                 | Multi-center     | Rural        | Population | Prospective               | 2013-2014 | Consecutive | 36.4       | 18-87            | 45.2  | Hypertension           | 84                        |                                | Low          |
| Abidoye, 2002      | Nigeria      | Cross-sectional                 | Single-center    | Urban        | Population | Prospective               | 2002      | Random      | NR         | 20-59            | NR    | Hypertension, Diabetes | 111                       | 33                             | Low          |
| Addo, 2006         | Ghana        | Cross-sectional                 | Multi-center     | Rural        | Population | Prospective               | 2006      | Random      | 42.4       | 18-99            | 30.0  | Hypertension           | 93                        |                                | Low          |
| Adeniyi, 2015      | South Africa | Cross-sectional                 | Single-center    | Rural        | Population | Retrospective             | 2013      | NR          | NR         | 30-              | 29.7  | Diabetes               |                           | 357                            | Low          |
| Aghaji, 2008       | Nigeria      | Cross-sectional                 | Single-center    | Rural        | Population | Prospective               | 2006      | Systematic  | 35         | 18-              | 59.6  | Hypertension           | 178                       |                                | Low          |
| Agunloye, 2013     | Nigeria      | Cross-sectional                 | Single-center    | Urban        | Hospital   | Prospective               | 2012      | Systematic  | 53.3       | 15-82            | 46.6  | Diabetes               |                           | 400                            | Low          |
| Akintunde, 2012    | Nigeria      | Cross-sectional                 | Single-center    | Urban        | Hospital   | Prospective               | NR        | Consecutive | 55.9       | 18-              | 47.1  | Hypertension           | 140                       |                                | Low          |
| Alebiosu, 2004     | Nigeria      | Cross-sectional                 | Single-center    | Urban        | Hospital   | Prospective               | 2000-2001 | Consecutive | 53.4       | 36-70            | 50.0  | Diabetes               |                           | 162                            | Low          |
| Allal-Alasmi, 2011 | Tunisia      | Cross-sectional                 | Single-center    | Urban        | Population | Prospective               | 2004-2005 | Random      | NR         | 35-70            | 45.0  | Hypertension           | 843                       |                                | Low          |
| Amer, 2011         | Egypt        | Case-control                    | Single-center    | Urban, Rural | Hospital   | Retrospective             | NR        | Systematic  | NR         | 60-              | 50.0  | Hypertension           | 60                        |                                | Low          |
| Amrane, 2012       | Algeria      | Case-control                    | Single-center    | Urban        | Hospital   | Retrospective             | 2007-2008 | Random      | NR         | 40-              | 51.1  | Diabetes               |                           | 178                            | Low          |
| Andy, 2012         | Nigeria      | Cross-sectional                 | Multi-center     | Rural        | Population | Prospective               | NR        | Consecutive | 34.3       | 15-              | 41.6  | Hypertension           | 914                       |                                | Low          |
| Angaw, 2015        | Ethiopia     | Cross-sectional                 | Single-center    | Urban        | Population | Prospective               | 2014      | Consecutive | 39         | 18-              | 44.4  | Hypertension           | 172                       |                                | Low          |
| Aryee, 2016        | Ghana        | Cross-sectional                 | Single-center    | Urban        | Hospital   | Retrospective             | 2012-2013 | Random      | NR         | 22-87            | NR    | Hypertension           | 180                       |                                | Low          |
| Asgedom, 2016      | Ethiopia     | Cross-sectional                 | Single-center    | Urban        | Hospital   | Prospective               | 2015      | Random      | 54.8       | 26-94            | 53.8  | Hypertension           | 286                       |                                | Low          |
| Awobusuyi, 2012    | Nigeria      | Cross-sectional                 | Single-center    | Urban        | Population | Prospective               | 2006      | Random      | 45         | NR               | 42.8  | Hypertension           | 139                       |                                | Low          |
| Ayah, 2013         | Kenya        | Cross-sectional                 | Single-center    | Urban        | Population | Prospective               | NR        | Random      | 33.4       | 18-              | 50.9  | Diabetes               |                           | 66                             | Low          |
| Babiker, 2013      | Sudan        | Cross-sectional                 | Single-center    | Urban        | Hospital   | Prospective               | NR        | Random      | NR         | 20-              | 46.0  | Hypertension           | 200                       |                                | Low          |
| Balla, 2014        | Sudan        | Cross-sectional                 | Multi-center     | Rural        | Population | Prospective               | 2012      | Random      | 46.7       | 18-              | 39.3  | Hypertension           | 477                       |                                | Low          |
| Baragou, 2011      | Togo         | Cross-sectional                 | Single-center    | NR           | Population | Prospective               | 2009      | NR          | NR         | 18-              | NR    | Hypertension           | 417                       |                                | High         |
| Bayray, 2012       | Ethiopia     | Case-control                    | Multi-center     | Urban        | Population | Prospective               | 2010-2011 | Random      | 60.3       | 40-              | 49.0  | Hypertension           | 110                       |                                | Low          |
| Bello-Sani, 2009   | Nigeria      | Cross-sectional                 | Single-center    | Urban        | Hospital   | Prospective               | NR        | Consecutive | 50.5       | 30-70            | 49.0  | Diabetes               |                           | 150                            | Low          |
| Ben Ahmed, 2012    | Tunisia      | Case-control                    | Single-center    | Urban        | Hospital   | Retrospective             | NR        | Random      | 61.4       | NR               | 73.0  | Diabetes               |                           | 126                            | Low          |
| Bentata, 2016      | Morocco      | Baseline data of a Cohort study | Single-center    | Urban        | Hospital   | Prospective               | 2009      | Consecutive | 65         | NR               | NR    | Diabetes               |                           | 671                            | Low          |

| Study             | Country                                 | Design                          | Number of center | Area         | Setting    | Timing of data collection | Period    | Sampling    | Age, years | Limit age, years | %Male | Disease                | Sample size, Hypertension | Sample size, diabetes mellitus | Risk of bias |
|-------------------|-----------------------------------------|---------------------------------|------------------|--------------|------------|---------------------------|-----------|-------------|------------|------------------|-------|------------------------|---------------------------|--------------------------------|--------------|
| Bouزيد, 2011      | Tunisia                                 | Cross-sectional                 | Single-center    | Urban        | Hospital   | Prospective               | NR        | Consecutive | 51.4       | 30-              | 59.0  | Diabetes               |                           | 120                            | Low          |
| Chin, 2017        | Uganda                                  | Case-control                    | Multi-center     | Urban        | Population | Prospective               | 2014      | Consecutive | NR         | 18-              | 61.5  | Hypertension           | 450                       |                                | Moderate     |
| Choukem, 2007     | Cameroon                                | Cross-sectional                 | Single-center    | Urban        | Hospital   | Prospective               | NR        | Consecutive | 56.6       | 15-86            | 50.0  | Hypertension, Diabetes | 140                       | 210                            | Low          |
| Choukem, 2016     | Cameroon                                | Cross-sectional                 | Single-center    | Urban        | Hospital   | Prospective               | NR        | Consecutive | 56.3       | 20-85            | 56.0  | Diabetes               |                           | 438                            | Moderate     |
| Dennison, 2007    | South Africa                            | Cross-sectional                 | Multi-center     | NR           | Hospital   | Prospective               | 2003-2004 | Consecutive | 52         | 35-65            | 45.4  | Hypertension           | 403                       |                                | Moderate     |
| Dickson, 2016     | Uganda                                  | Cross-sectional                 | Single-center    | NR           | Hospital   | Prospective               | 2014      | Consecutive | NR         | 20-              | NR    | Diabetes               |                           | 701                            | Moderate     |
| Dinar, 2015       | Morocco                                 | Cross-sectional                 | Single-center    | NR           | Hospital   | Prospective               | 2011-2012 | Consecutive | 49         | 20-65            | 40.4  | Diabetes               |                           | 240                            | Moderate     |
| Dionadji, 2010    | Algeria                                 | Cross-sectional                 | Single-center    | NR           | Hospital   | Prospective               | 2004-2005 | Consecutive | 59         | NR               | 46.18 | Diabetes               |                           | 262                            | Moderate     |
| Distiller, 2006   | South Africa                            | Cross-sectional                 | Single-center    | Urban        | Hospital   | Prospective               | NR        | Consecutive | 48         | 19-76            | 51.35 | Diabetes               |                           | 148                            | Moderate     |
| Dunbar, 2015      | South Africa                            | Cross-sectional                 | Multi-center     | NR           | Hospital   | Retrospective             | 2009-2011 | Consecutive | 62.2       | NR               | 50.1  | Diabetes               |                           | 593                            | Moderate     |
| Duncan, 2014      | South Africa                            | Cross-sectional                 | Multi-center     | Rural        | Hospital   | Retrospective             | 2012      | Consecutive | 58         | 23-98            | 22.0  | Hypertension           | 500                       |                                | Low          |
| Edwards, 2000     | Tanzania                                | Cross-sectional                 | Multi-center     | Urban, Rural | Population | Prospective               | 1996-1997 | Consecutive | NR         | NR               | 72.51 | Hypertension           | 516                       |                                | Low          |
| Egbi, 2015        | Nigeria                                 | Cross-sectional                 | Single-center    | Urban        | Hospital   | Prospective               | NR        | Consecutive | 52.9       | 16-89            | 37.6  | Hypertension, Diabetes | 32                        | 24                             | Low          |
| El Achhab, 2008   | Morocco                                 | Case-control                    | Multi-center     | NR           | Hospital   | Prospective               | 2004-2006 | Random      | NR         | 40-              | 100.0 | Diabetes               |                           | 89                             | Moderate     |
| El-Shazly, 2002   | Egypt                                   | Case-control                    | Multi-center     | NR           | Hospital   | Prospective               | 2000-2001 | Random      | NR         | NR               | 50.9  | Diabetes               |                           | 1000                           | Low          |
| Esekwesili, 2016  | Nigeria                                 | Cross-sectional                 | Multi-center     | NR           | Population | Prospective               | NR        | Random      | NR         | 17-79            | 47.81 | Hypertension           | 205                       |                                | Low          |
| Fatouh, 2009      | Egypt                                   | Cross-sectional                 | Multi-center     | NR           | Hospital   | Retrospective             | 2009      | Random      | 55.2       | 17-              | 24.0  | Diabetes               |                           | 384                            | High         |
| Fawzy, 2014       | Egypt                                   | Cross-sectional                 | Single-center    | NR           | Hospital   | Prospective               | 2011-2012 | Random      | 43.8       | 14-67            | 43.0  | Diabetes               |                           | 100                            | Moderate     |
| Gill, 2008        | Ethiopia                                | Baseline data of a Cohort study | Single-center    | Rural        | Hospital   | Prospective               | NR        | Consecutive | 41         | 16-77            | 70.0  | Diabetes               |                           | 105                            | Moderate     |
| Grace, 2012       | South Africa                            | Cross-sectional                 | Multi-center     | NR           | Population | Prospective               | NR        | Random      | 41.7       | 26-58            | 100.0 | Hypertension           | 49                        |                                | Moderate     |
| Guwatudde, 2015   | Uganda, South Africa, Tanzania, Nigeria | Baseline data of a Cohort study | Multi-center     | Urban, Rural | Population | Retrospective             | 2011-2012 | Random      | NR         | 18-              | 35.4  | Hypertension           | 369                       |                                | Low          |
| Jingi, 2016       | Cameroon                                | Cross-sectional                 | Single-center    | Urban        | Hospital   | Retrospective             | NR        | Consecutive | 59.3       | 44-84            | 61.3  | Diabetes               |                           | 134                            | Low          |
| Joshi, 2014       | Kenya                                   | Cross-sectional                 | Single-center    | Rural        | Population | Prospective               | NR        | Consecutive | 33.4       | 18-90            | 50.9  | Hypertension           | 260                       |                                | Low          |
| Katalambula, 2017 | Tanzania                                | Cross-sectional                 | Single-center    | Urban        | Population | Prospective               | 2016      | Consecutive | 40.7       | 25-64            | 42.4  | Hypertension           | 245                       |                                | Moderate     |
| Katchunga, 2011   | DR Congo                                | Cross-sectional                 | Single-center    | Urban, Rural | Population | Prospective               | NR        | Random      | NR         | NR               | 36.5  | Hypertension           | 284                       |                                | Low          |
| Katibi, 2010      | Nigeria                                 | Cross-sectional                 | Single-center    | NR           | Hospital   | Prospective               | 2002      | Consecutive | 57.7       | 35-82            | 44.6  | Hypertension           | 224                       |                                | Moderate     |
| Kavishe, 2015     | Tanzania, Uganda                        | Cross-sectional                 | Multi-center     | Urban, Rural | Population | Prospective               | 2012-2013 | Random      | 33         | NR               | 48.0  | Hypertension           | 179                       |                                | Low          |

| Study               | Country                                    | Design                          | Number of center | Area         | Setting    | Timing of data collection | Period    | Sampling    | Age, years | Limit age, years | %Male | Disease                | Sample size, Hypertension | Sample size, diabetes mellitus | Risk of bias |
|---------------------|--------------------------------------------|---------------------------------|------------------|--------------|------------|---------------------------|-----------|-------------|------------|------------------|-------|------------------------|---------------------------|--------------------------------|--------------|
| Kebede,2013         | Ethiopia                                   | Cross-sectional                 | Single-center    | Urban        | Hospital   | Prospective               | 2012      | Consecutive | 42.3       | 15-81            | 42.0  | Hypertension           | 97                        |                                | Low          |
| Keetile,2015        | Botswana                                   | Cross-sectional                 | Single-center    | Urban, Rural | Population | Prospective               | 2007      | Random      | NR         | 25-64            | 32.1  | Hypertension           | 642                       |                                | Low          |
| Khalil, 2016        | Egypt                                      | Case-control                    | Single-center    | Urban        | Hospital   | Prospective               | NR        | Consecutive | 54.6       | NR               | 68.75 | Diabetes               |                           | 80                             | Moderate     |
| Kingue,2017         | Cameroon, Nigeria, DR of Congo, Madagascar | Cross-sectional                 | Multi-center     | Urban        | Hospital   | Prospective               | 2011-2013 | Consecutive | 52.6       | NR               | 42.6  | Hypertension, Diabetes | 624                       | 132                            | Low          |
| Kirui,2012          | Kenya                                      | Cross-sectional                 | Multi-center     | Urban, Rural | Hospital   | Retrospective             | 2007-2011 | Consecutive | 53.5       | NR               | 45.0  | Diabetes               |                           | 1376                           | High         |
| Kotwani,2014        | Uganda                                     | Cross-sectional                 | Single-center    | Rural        | Population | Prospective               | 2012      | Consecutive | 49.5       | NR               | 52.8  | Hypertension           | 214                       |                                | Moderate     |
| Kramoh,2012         | Ivory Coast                                | Cross-sectional                 | Single-center    | Urban        | Hospital   | Retrospective             | 2000-2009 | Consecutive | 73.1       | 65-98            | 41.0  | Hypertension           | 849                       |                                | Moderate     |
| Makinga,2013        | Lesotho                                    | Cross-sectional                 | Multi-center     | Urban        | Hospital   | Prospective               | 2004-2005 | Consecutive | 54.7       | NR               | 24.5  | Diabetes               |                           | 189                            | Moderate     |
| Mbaye,2011          | Senegal                                    | Cross-sectional                 | Single-center    | Urban        | Population | Prospective               | 2010      | Random      | 43.4       | 15-96            | 31.0  | Diabetes               |                           | 148                            | Moderate     |
| Mekong,2012         | Cameroon                                   | Cross-sectional                 | Single-center    | Urban        | Hospital   | Prospective               | 2009-2010 | Consecutive | 57         | 29-85            | 43.6  | Diabetes               |                           | 205                            | Low          |
| Mengesha,2006       | Botswana                                   | Cross-sectional                 | Multi-center     | Urban        | Hospital   | Prospective               | 2003-2004 | Consecutive | 53.8       | NR               | 28.4  | Diabetes               |                           | 401                            | Moderate     |
| Muhamedhussein,2016 | Tanzania                                   | Cross-sectional                 | Single-center    | Rural        | Population | Prospective               | 2011      | Consecutive | 44.5       | 41-50            | 49.1  | Hypertension, Diabetes | 282                       | 58                             | Moderate     |
| Mundan,2013         | Kenya                                      | Case-control                    | Single-center    | Urban        | Hospital   | Prospective               | NR        | Consecutive | 45.1       | NR               | 95.0  | Hypertension           | 170                       |                                | Moderate     |
| Musinguzi,2013      | Uganda                                     | Cross-sectional                 | Multi-center     | Urban, Rural | Population | Prospective               | 2012      | Systematic  | 36.2       | NR               | 35.5  | Hypertension           | 1000                      |                                | Moderate     |
| Mwita,2012          | Tanzania                                   | Cross-sectional                 | Single-center    | Urban        | Hospital   | Prospective               | 2010      | Consecutive | 51.6       | NR               | 38.0  | Diabetes               |                           | 150                            | Moderate     |
| Namusisi,2011       | Uganda                                     | Cross-sectional                 | Single-center    | Urban        | Hospital   | Retrospective             | 2005-2010 | Consecutive | 39.6       | NR               | 39.0  | Diabetes               |                           | 1383                           | Moderate     |
| Ndege,2014          | Kenya                                      | Cross-sectional                 | Single-center    | Urban        | Hospital   | Prospective               | 2011-2012 | Systematic  | 56.6       | NR               | 44.0  | Diabetes               |                           | 218                            | Moderate     |
| Ntuli, 2015         | South Africa                               | Cross-sectional                 | NR               | Rural        | Population | Prospective               | 2011-2012 | NR          | 44.2       | 15-98            | 37.0  | Hypertension           | 530                       |                                | Moderate     |
| Nuwaha, 2013        | Uganda                                     | Cross-sectional                 | Single-center    | NR           | Population | NR                        | NR        | NR          | 36.5       | NR               | 35.7  | Hypertension           | 962                       |                                | Moderate     |
| Ogedengbe, 2014     | Nigeria                                    | Cross-sectional                 | Single-center    | NR           | Hospital   | NR                        | NR        | NR          | 58.6       | 30-              | 40.3  | Diabetes               |                           | 124                            | High         |
| Oguntibeju, 2012    | Nigeria                                    | Baseline data of a Cohort study | Multi-center     | NR           | Hospital   | NR                        | NR        | NR          | 64.75      | 40-89            | 31.0  | Diabetes               |                           | 100                            | High         |
| Okpechi, 2013       | Nigeria                                    | Cross-sectional                 | NR               | Urban, Rural | Population | NR                        | 2011-2012 | NR          | 41.7       | 18-              | 47.9  | Hypertension           | 936                       |                                | Moderate     |
| Olack, 2015         | Kenya                                      | Cross-sectional                 | Multi-center     | Urban        | Population | Prospective               | 2013      | Random      | 46.7       | 35-64            | 42.0  | Hypertension           | 449                       |                                | Moderate     |
| Oladimeji, 2014     | Nigeria                                    | Cross-sectional                 | Multi-center     | NR           | Population | NR                        | NR        | Random      | 43         | 20-              | 62.2  | Hypertension           | 232                       |                                | Moderate     |
| Olatunbosun, 2000   | Nigeria                                    | Cross-sectional                 | NR               | NR           | Population | NR                        | NR        | Random      | 40.02      | NR               | 58.0  | Hypertension           | 103                       |                                | Moderate     |
| Otieno, 2006        | Kenya                                      | Cross-sectional                 | Single-center    | NR           | Hospital   | Prospective               | NR        | Consecutive | NR         | NR               | 42.7  | Diabetes               |                           | 211                            | Low          |
| Owolabi, 2017       | South Africa                               | Cross-sectional                 | Multi-center     | NR           | Hospital   | Prospective               | 2016      | NR          | NR         | 18-              | 32.5  | Hypertension           | 491                       |                                | Moderate     |

| Study             | Country                    | Design                          | Number of center | Area         | Setting    | Timing of data collection | Period    | Sampling               | Age, years | Limit age, years | %Male | Disease      | Sample size, Hypertension | Sample size, diabetes mellitus | Risk of bias |
|-------------------|----------------------------|---------------------------------|------------------|--------------|------------|---------------------------|-----------|------------------------|------------|------------------|-------|--------------|---------------------------|--------------------------------|--------------|
| Pancha, 2016      | Cameroon                   | Cross-sectional                 | NR               | NR           | Population | Prospective               | 2014      | Stratified consecutive | 36         | 18-93            | 48.6  | Hypertension | 143                       |                                | Moderate     |
| Sadikot, 2016     | Benin, Congo, South Africa | Cross-sectional                 | Multi-center     | Urban        | Population | Prospective               | NR        | Consecutive            | 68         | NR               | 63.0  | Diabetes     |                           | 1244                           | Low          |
| Tamiru, 2010      | Ethiopia                   | Cross-sectional                 | Single-center    | Urban, Rural | Hospital   | NR                        | 2007      | Random                 | 45.3       | 18-              | 62.1  | Diabetes     |                           | 256                            | Moderate     |
| Thiam, 2011       | Senegal                    | Cross-sectional                 | Single-center    | NR           | Hospital   | NR                        | NR        | NR                     | 57         | NR               | 64.7  | Hypertension | 85                        |                                | Low          |
| Thomas, 2013      | South Africa               | Baseline data of a Cohort study | Single-center    | NR           | Hospital   | Retrospective             | 2001-2010 | Consecutive            | 50.8       | NR               | 63.4  | Diabetes     |                           | 5515                           | High         |
| Tibebu, 2017      | Ethiopia                   | Cross-sectional                 | Multi-center     | NR           | Hospital   | Prospective               | 2015      | Random                 | 54         | 18-              | 52.0  | Hypertension | 404                       |                                | Moderate     |
| Tshitenge, 2015   | Botswana                   | Cross-sectional                 | Single-center    | Rural        | Population | NR                        | 2008      | Systematic             | NR         | 20-82            | 37.0  | Hypertension | 51                        |                                | High         |
| Wondemagegn, 2017 | Ethiopia                   | Cross-sectional                 | Single-center    | Urban, Rural | Population | Prospective               | 2016      | Systematic             | 49         | 25-              | 59.0  | Diabetes     |                           | 83                             | Moderate     |
| Yaméogo, 2013     | Burkina Faso               | Cross-sectional                 | Single-center    | Urban, Rural | Hospital   | NR                        | 2010-2011 | Consecutive            | NR         | NR               | 43.2  | Hypertension | 456                       |                                | Moderate     |

NR: Not reported

Supplementary Table 3 : *Univariate meta-regression analysis for factors associated with the variation of the prevalence of current tobacco smoking in people with hypertension in Africa*

|                           | <b>Coefficient</b>          | <b>P value</b> |
|---------------------------|-----------------------------|----------------|
| Year of publication       | -0.0019 (-0.0107 ; 0.0069)  | 0.668          |
| Age                       | -0.0014 (-0.0064 ; 0.0035)  | 0.577          |
| % of males                | 0.0254 (-0.0895 ; 0.1402)   | 0.665          |
| Region (Northern Africa)* |                             |                |
| - Sub-Saharan Africa      | -0.1976 (-0.3160 ; -0.0793) | 0.001          |
| Area (Rural)              |                             | 0.546          |
| - Urban                   | -0.0545 (-0.1560 ; 0.0471)  |                |
| - Urban and rural         | -0.0173 (-0.1355 ; 0.1010)  |                |
| Setting (Hospital)        |                             |                |
| - Population              | 0.0019 (-0.0718 ; 0.0757)   | 0.959          |
| Sample size               | -0.0222 (-0.0648 ; 0.0204)  | 0.307          |

Residual heterogeneity  $I^2 = 94.1\%$ , \*explained heterogeneity = 16.6%

Supplementary Table 4: *Univariate meta-regression analysis for factors associated with the variation of the prevalence of current tobacco smoking in people with diabetes in Africa*

|                           | <b>Univariate model</b>     |         | <b>Multivariate model</b>   |         |
|---------------------------|-----------------------------|---------|-----------------------------|---------|
|                           | Coefficient                 | P value | Coefficient                 | P value |
| Year of publication       | 0.0071 (-0.0058 ; 0.0200)   | 0.283   |                             |         |
| Age                       | 0.0064 (-0.0008 ; 0.0135)   | 0.080   |                             |         |
| % of males                | 0.0022 (-0.0012 ; 0.0056)   | 0.197   |                             |         |
| Region (Northern Africa)* |                             |         |                             |         |
| - Sub-Saharan Africa      | -0.1515 (-0.2677 ; -0.0352) | 0.011   | -0.1515 (-0.2677 ; -0.0352) | 0.011   |
| Area (Rural)              |                             | 0.183   |                             |         |
| - Urban                   | 0.1441 (-0.0485 ; 0.3367)   |         |                             |         |
| - Urban and rural         | 0.0212 (-0.2333 ; 0.2756)   |         |                             |         |
| Setting (Hospital)        |                             |         |                             |         |
| - Population              | 0.1250 (-0.2662 ; 0.0162)   | 0.083   |                             |         |
| Sample size               | 0.0422 (-0.0103 ; 0.0947)   | 0.115   |                             |         |

Residual heterogeneity  $I^2 = 97.7\%$ , \*total explained heterogeneity = 3.1%

Supplementary Figure 1 : Prevalence of active smoking in people with hypertension in Africa according to sex

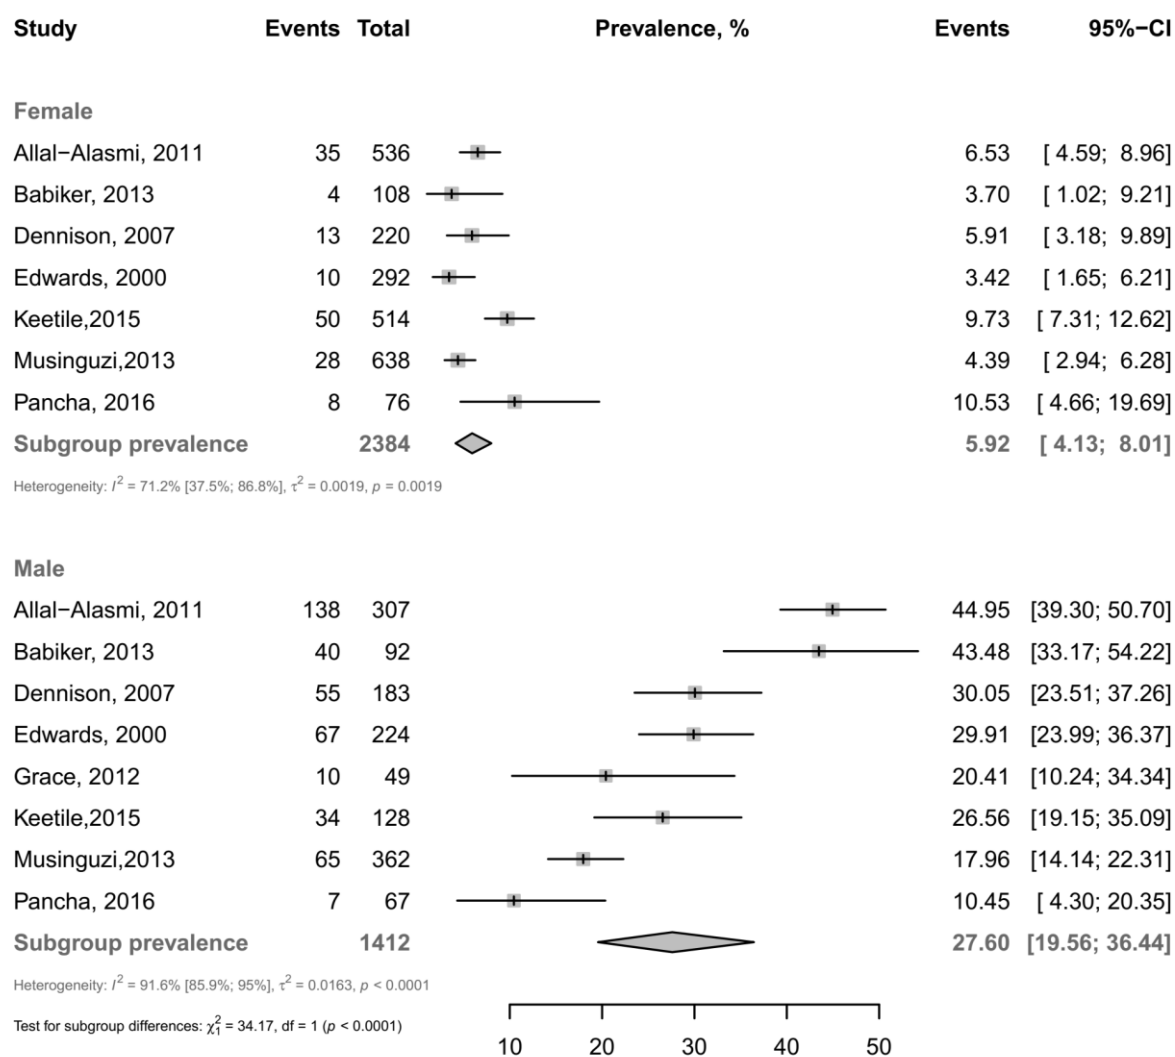



Supplementary Figure 2 : Prevalence of active smoking in people with hypertension in Africa according to sub-regions

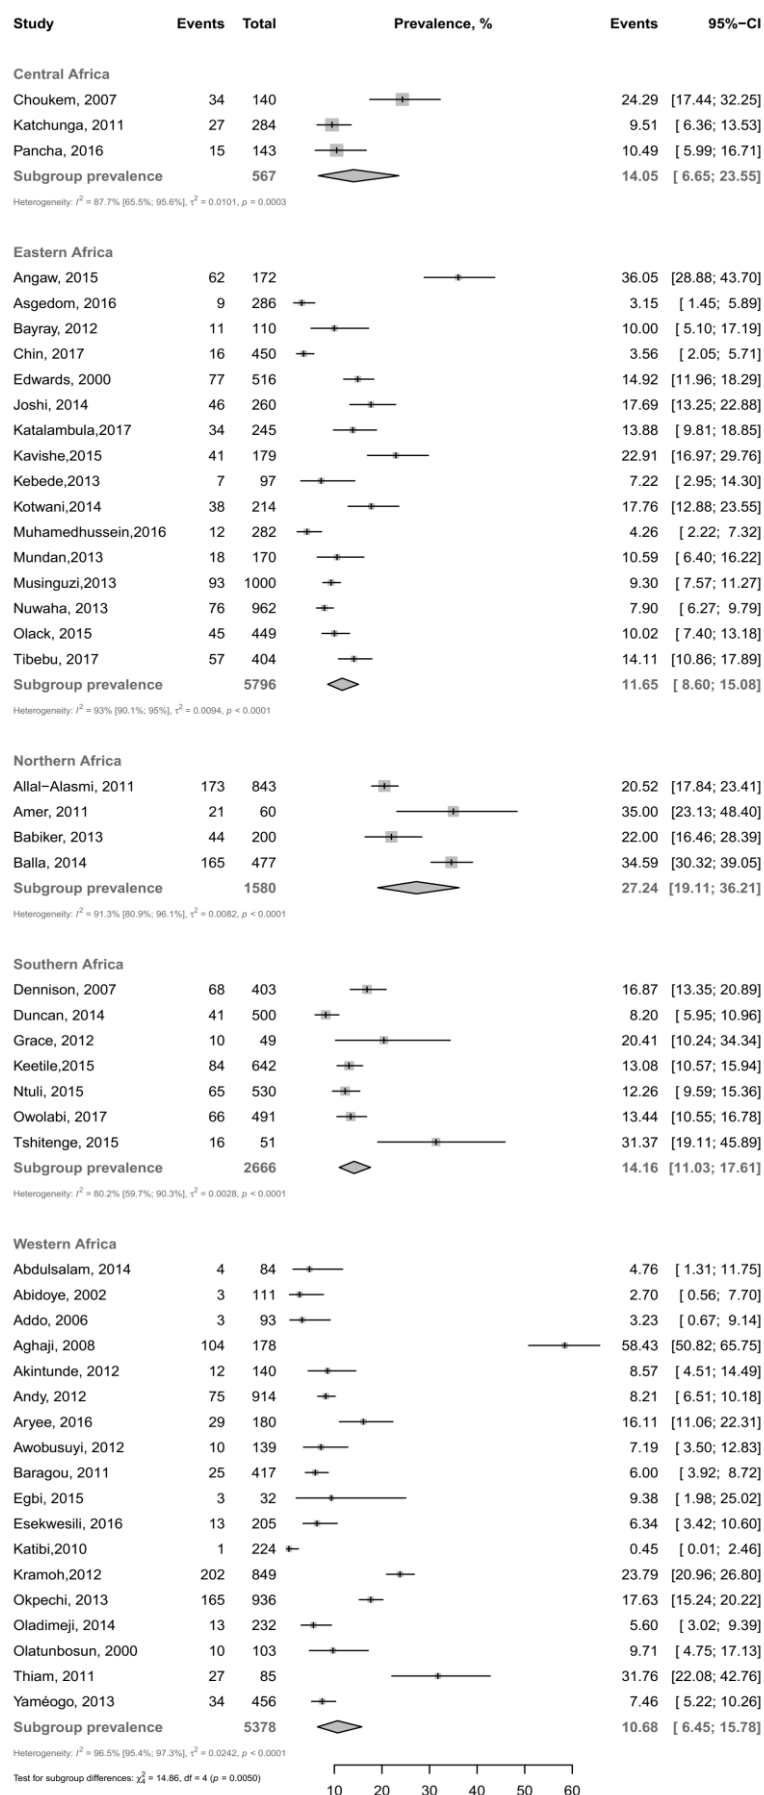

Supplementary Figure 3 : Prevalence of active smoking in people with hypertension in Africa according to area

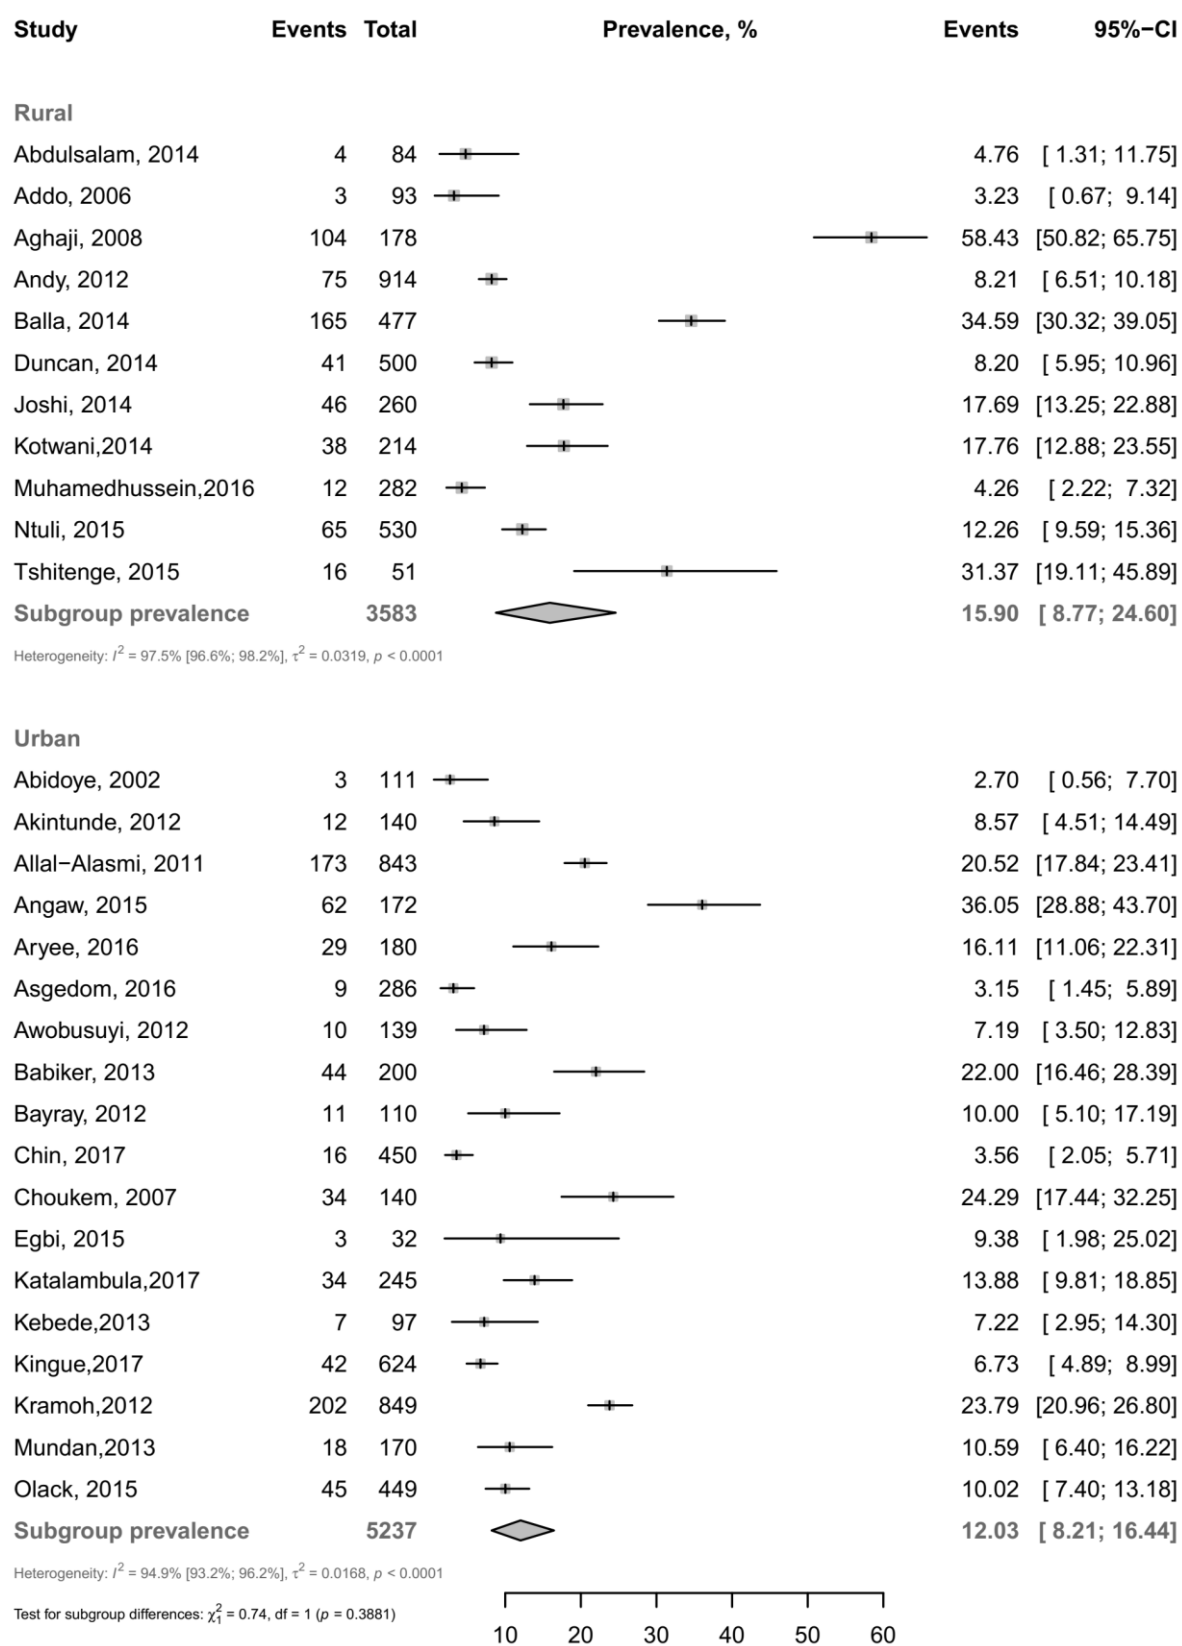

Supplementary Figure 4 : Prevalence of active smoking in people with hypertension in Africa according to area

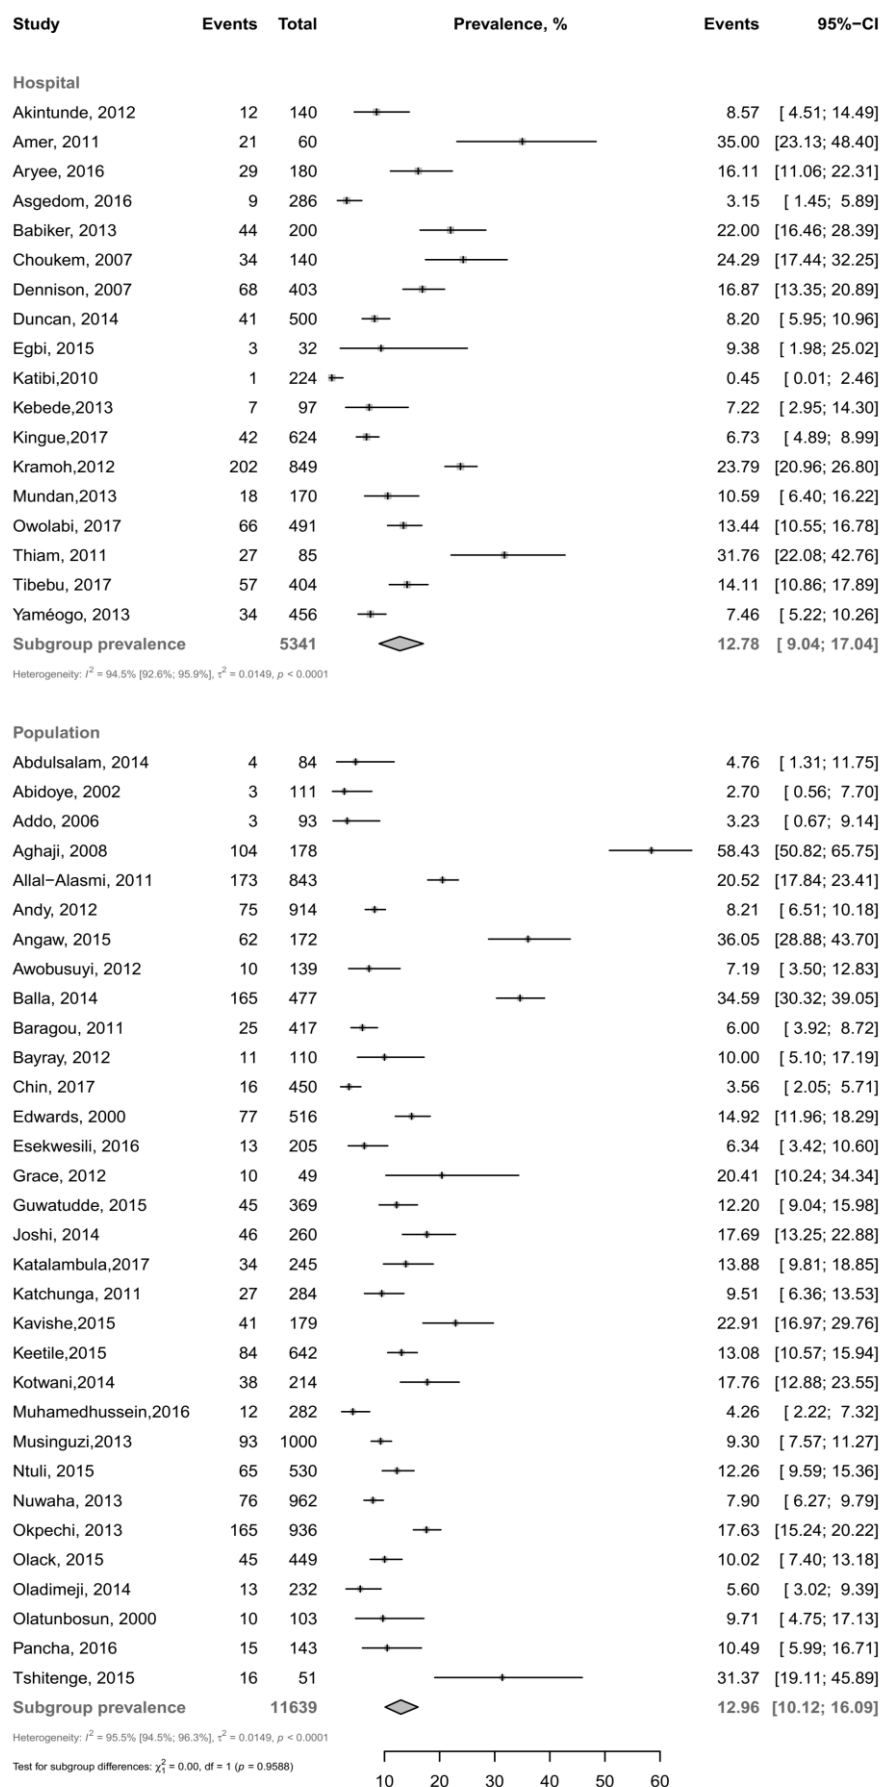

Supplementary Figure 5 : Funnel plot for publication bias in the prevalence of active smoking in people with hypertension in Africa

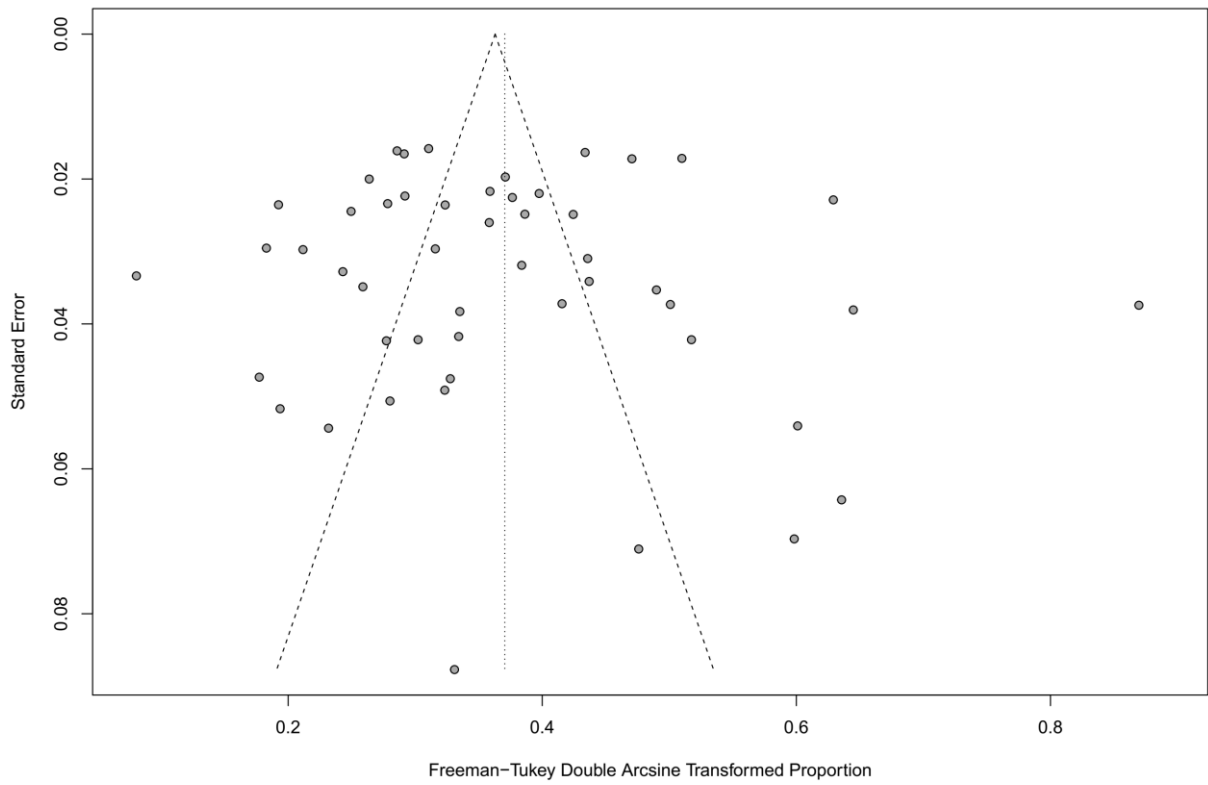

Supplementary Figure 6 : Prevalence of active smoking in people with diabetes mellitus in Africa according to sex

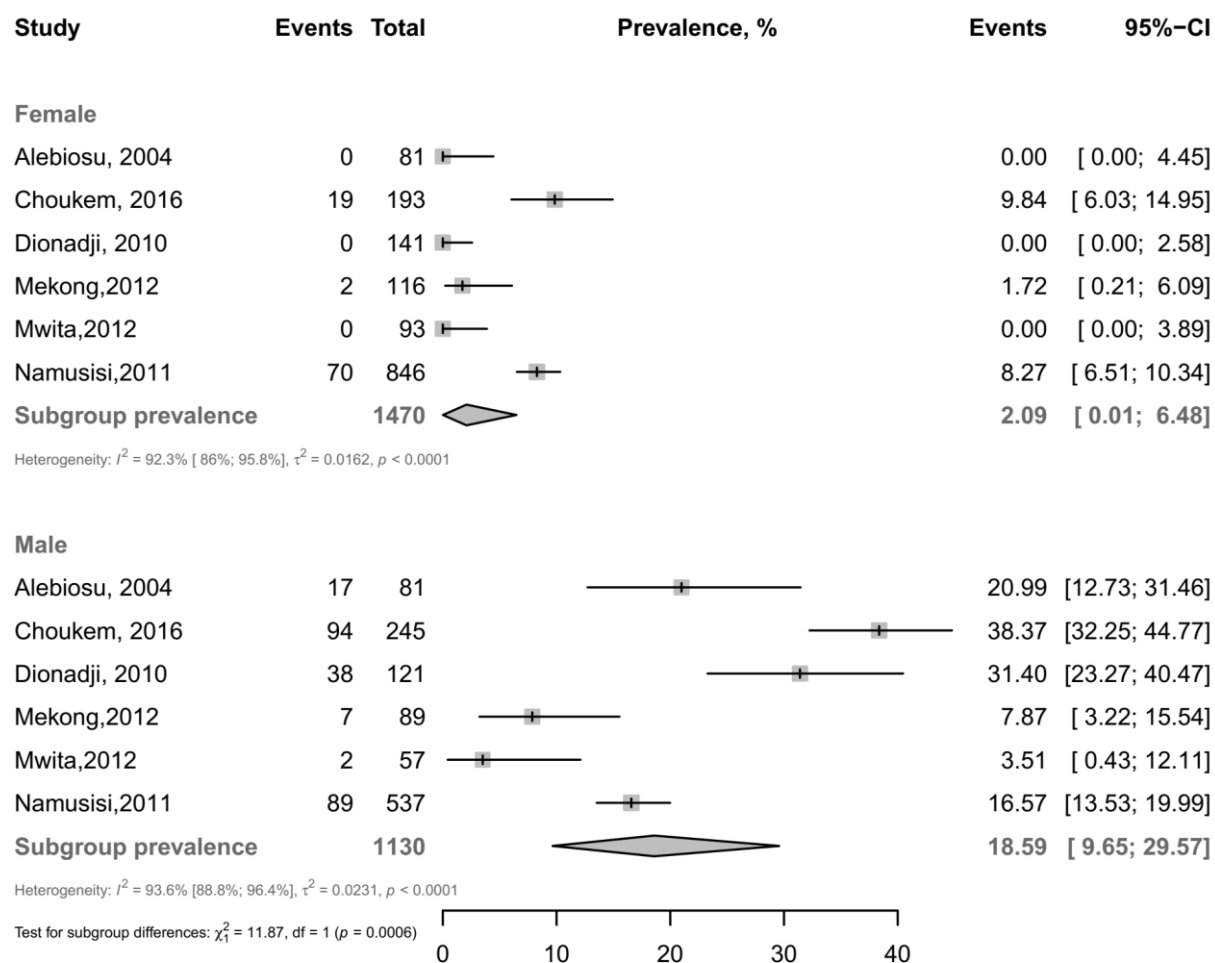

Supplementary Figure 7 : Prevalence of active smoking in people with diabetes mellitus in Africa according to sub-regions

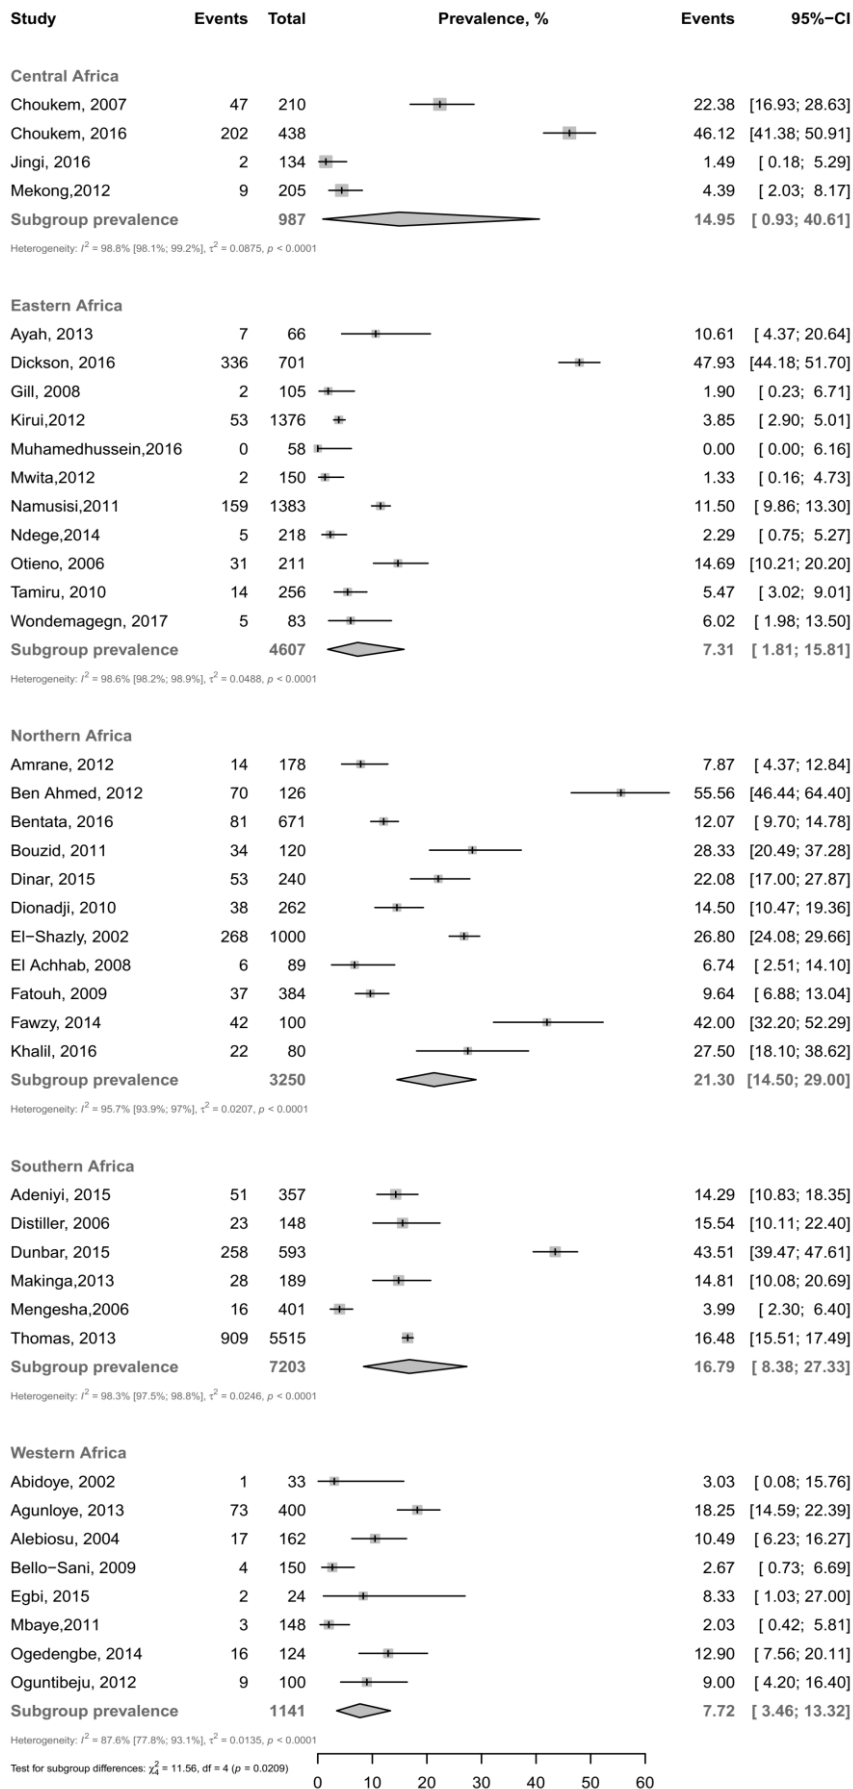

Supplementary Figure 8 : Prevalence of active smoking in people with diabetes mellitus in Africa according to area

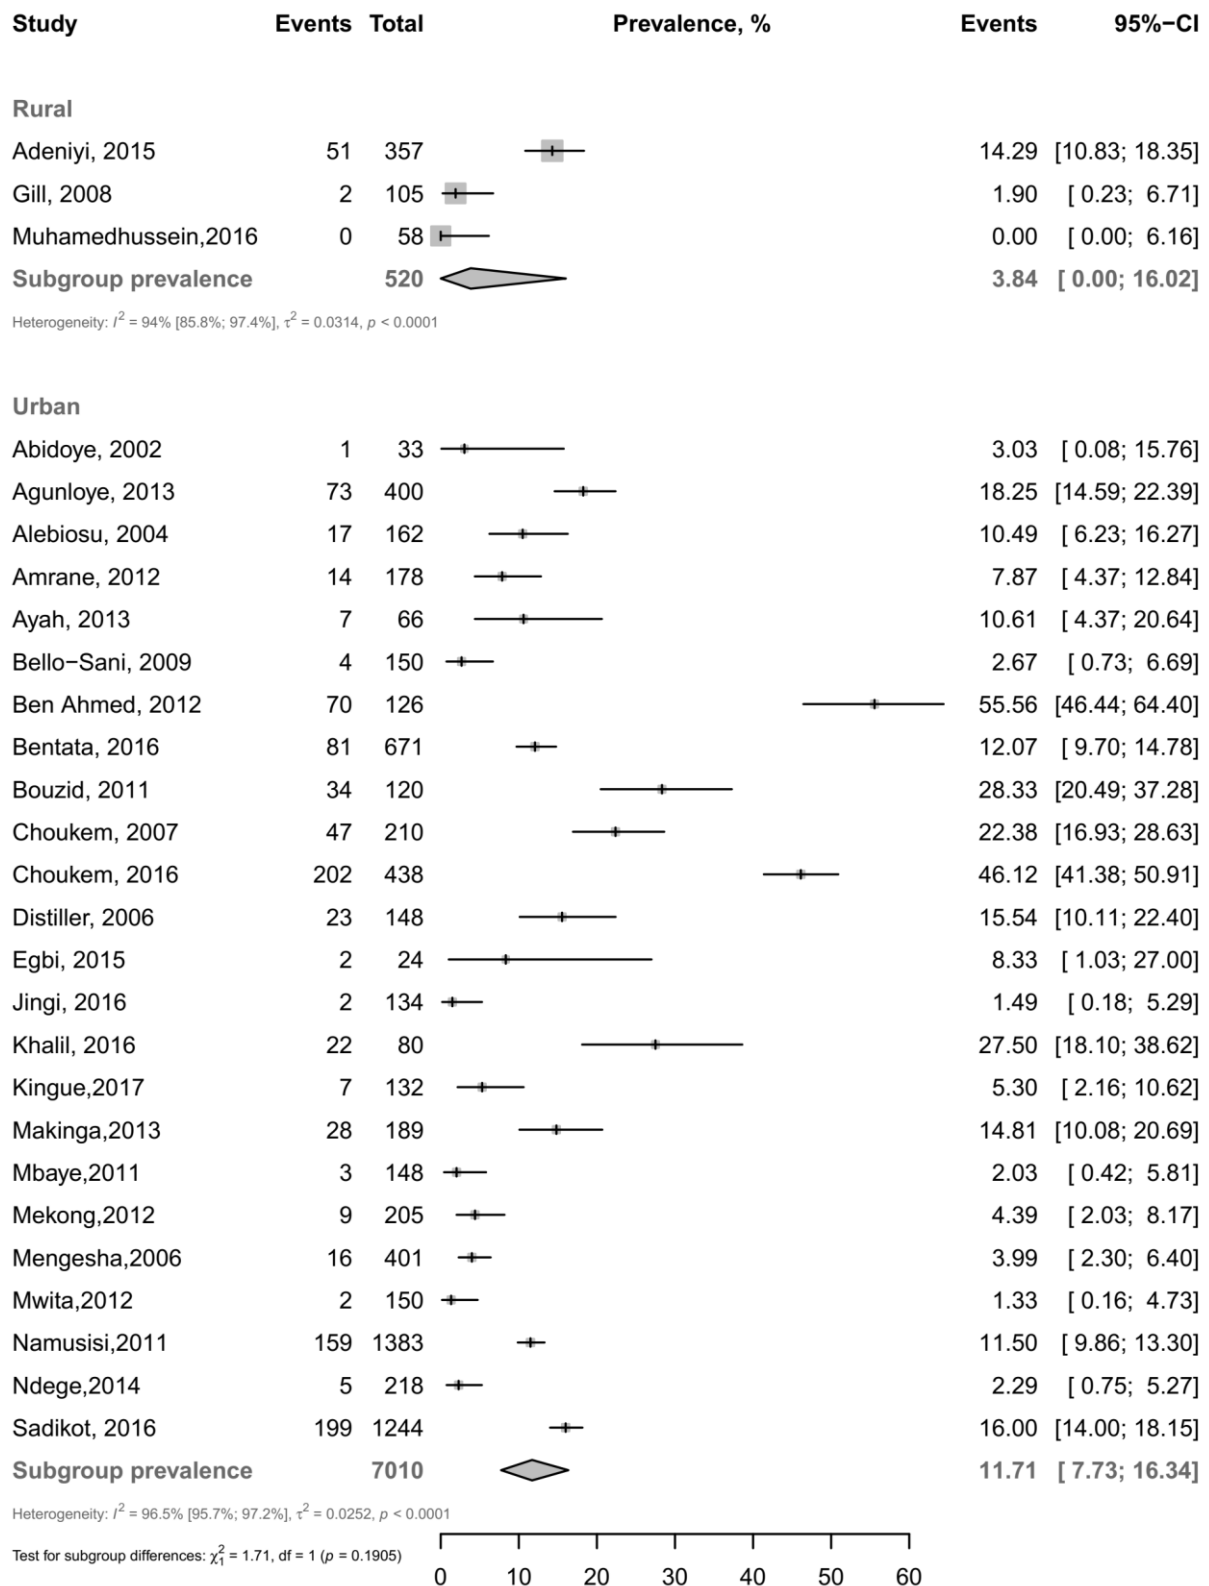

Supplementary Figure 9 : Prevalence of active smoking in people with diabetes mellitus in Africa according to setting

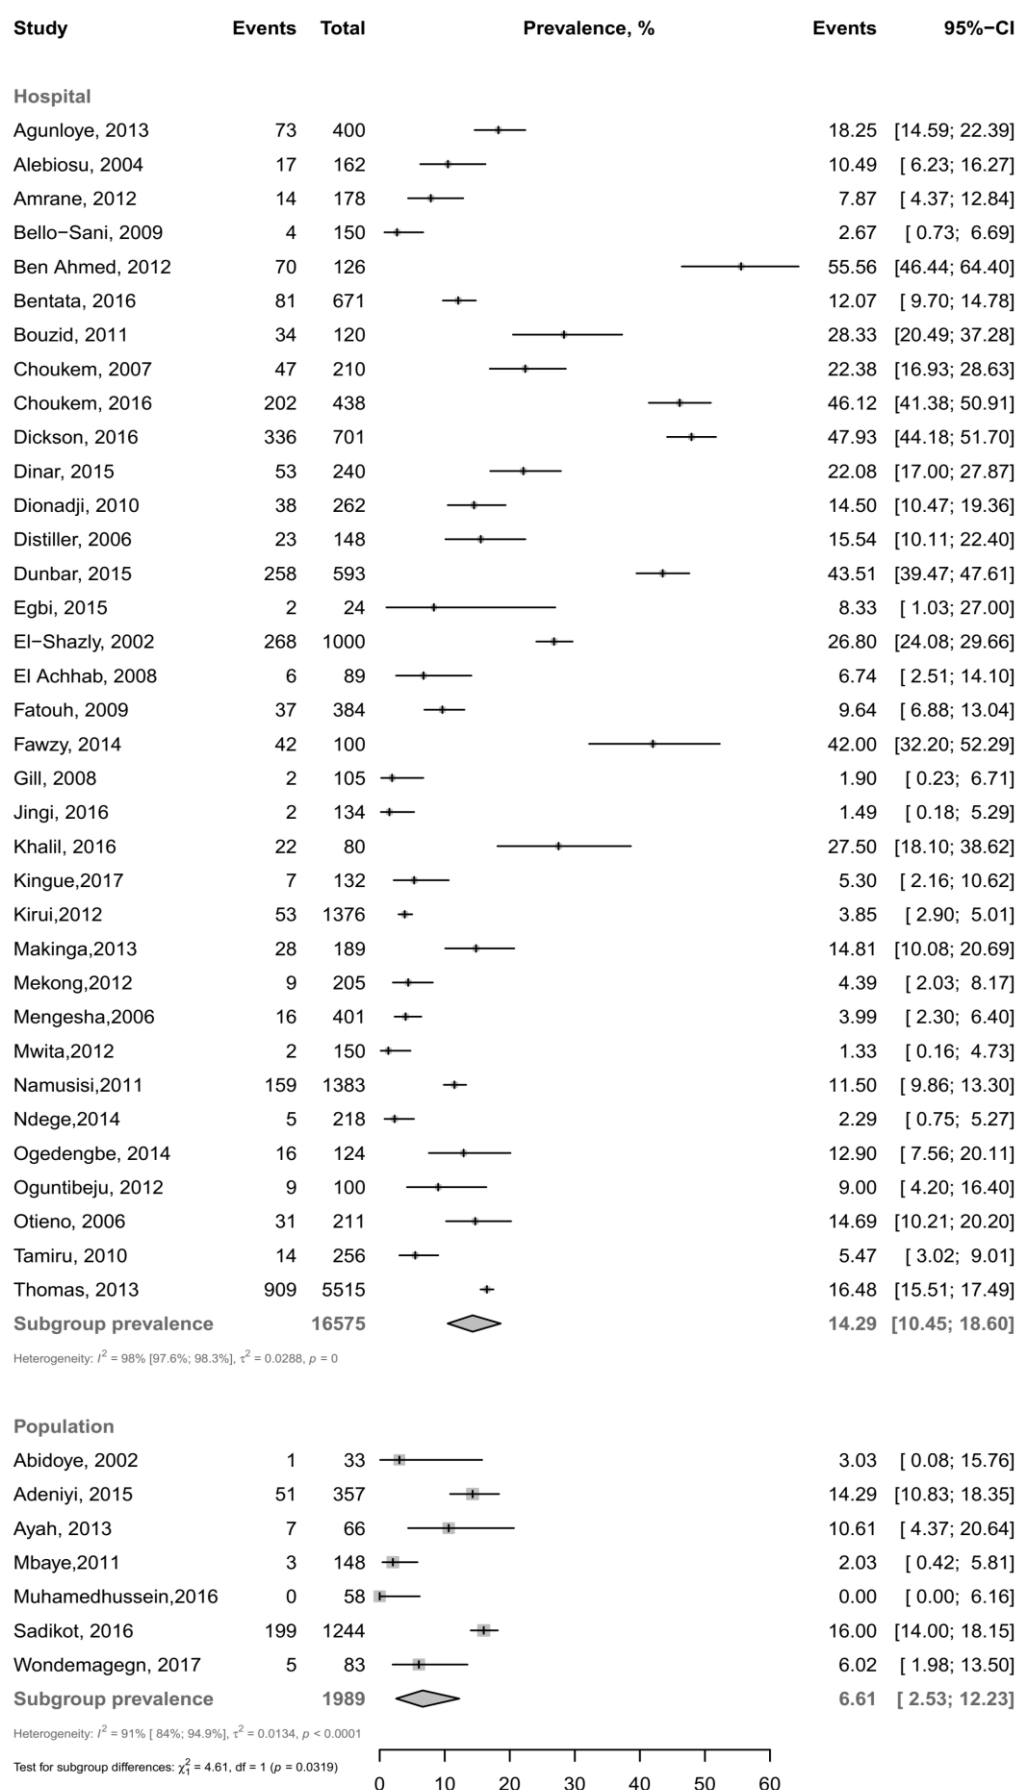



Supplementary Figure 10 : Funnel plot for publication bias in the prevalence of active smoking in people with hypertension in Africa

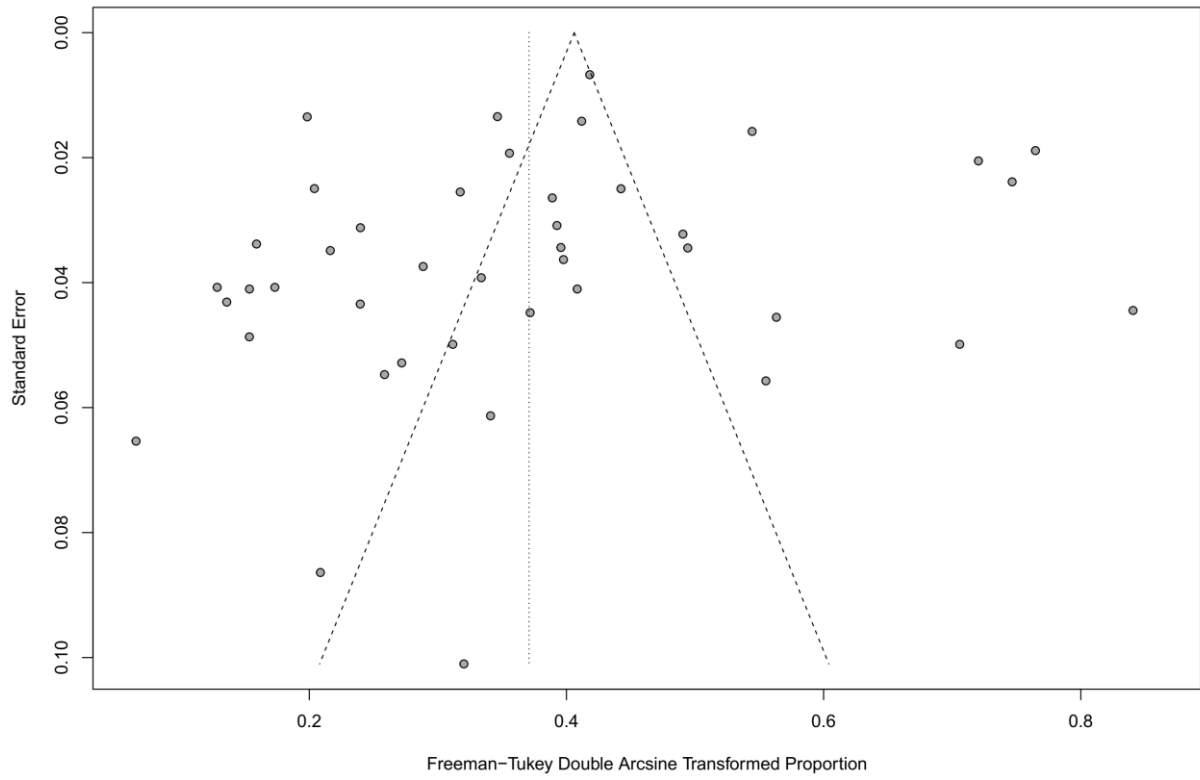

Supplement: 41598_2018_37858_MOESM1_ESM.pdf [file 41598_2018_37858_MOESM1_ESM.pdf]
